# Supplementary material for: An extremely rapid-response fluorescent probe for hydrogen peroxide and its application in living cells
Source: Royal Society of Chemistry journal article supplement (doi:10.1039/c6ra12984f), 2016-01-01

## **Supporting Information**

### **An extremely rapid-response fluorescence probe for hydrogen peroxide and its applications in living cells**

Fuxu Zhan, Qian Yang, Qiufen Wang, Qilong Zhuang, Zhiyuan Zhuang, Xue Feng, Guangyou Zhang, Gengxiu Zheng\*

School of Chemistry and Chemical Engineering, University of Jinan, Jinan 250022, China

Tel: +86-53182765841; chm\_zhenggx@ujn.edu.cn (G. X. Zheng).

## General information

All reagents and solvents were purchased from commercial suppliers and used without further purification unless otherwise stated. Deionized water was used throughout all experiments. All reactions were magnetically stirred and monitored by thin layer chromatography (TLC). Column chromatography was performed using 200-300 mesh silica gel supplied by Qingdao Marine Chemical Factor. The  $^1\text{H}$  NMR and  $^{13}\text{C}$  NMR spectra were recorded on a Bruker AVANCE AV400 at 400 and 100 MHz, respectively. All NMR chemical shifts were referenced to residual solvent peaks or to  $\text{Si}(\text{CH}_3)_4$  as an internal standard, spectra recorded in  $\text{CDCl}_3$  were referenced to residual  $\text{CHCl}_3$  at 7.26 ppm for  $^1\text{H}$  or 77.0 ppm for  $^{13}\text{C}$ . All coupling constants  $J$  are quoted in Hz. FTIR spectra were obtained with a Bruker Vertex 70 FT-IR spectrometer with KBr pellets. All IR samples were prepared as thin film and reported in wave numbers ( $\text{cm}^{-1}$ ). High resolution mass spectra were obtained on a Q-TOF6510 instrument mass spectrometer. Fluorescence spectra were carried out on an Edinburgh Instruments Ltd-FLS920 fluorescence spectrophotometer.

## 1. Synthesis and Characterization of Compounds

2',7'-dichlorodihydrofluorescein<sup>1</sup> and 2-(azidomethyl)benzoic acid<sup>2</sup> were prepared according to the reported methods previously.

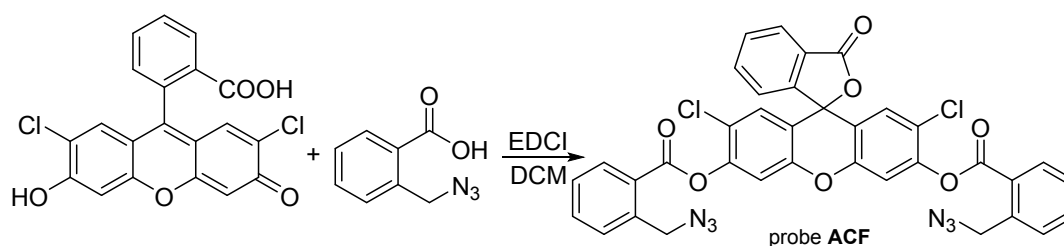

A solution of 2-(azidomethyl)benzoic acid (529.4 mg, 3.0 mmol) in DCM (5 mL), was added EDCI (718.9 mg, 3.75 mmol), DMAP (152.7 mg, 1.25 mmol) and 2',7'-dichlorodihydrofluorescein (500.0 mg, 1.25 mmol). The resulting mixture was warmed to room temperature and stirred for 12 h. The resulting solution was poured into water (30 mL) and extracted with DCM (3×20 mL). Combined organic layers were washed with brine, dried over anhydrous  $\text{MgSO}_4$  and concentrated to

afford a red oil. Flash chromatography of the crude product (5:1 petroleum ether:ethyl acetate) provided the desired product as colorless oil (494.6 mg, 55%). Data for **ACF**:  $R_f$  0.35 (petroleum ether:ethyl acetate = 5:1);  $^1\text{H}$  NMR (400 MHz,  $\text{CDCl}_3$ )  $\delta$  8.34 (dd,  $J$  = 7.9, 1.1 Hz, 2H), 8.10 (d,  $J$  = 7.5 Hz, 1H), 7.78 (td,  $J$  = 7.5, 1.2 Hz, 1H), 7.73 (dd,  $J$  = 7.5, 0.9 Hz, 1H), 7.69 (td,  $J$  = 7.6, 1.3 Hz, 2H), 7.61 (d,  $J$  = 7.2 Hz, 2H), 7.57 – 7.46 (m, 2H), 7.34 (s, 2H), 7.25 (d,  $J$  = 0.9 Hz, 1H), 6.96 (s, 2H), 4.88 (s, 4H).  $^{13}\text{C}$  NMR (100 MHz,  $\text{CDCl}_3$ )  $\delta$  168.62, 163.59, 152.00, 149.82, 148.44, 138.79, 134.17, 132.03, 130.00, 129.07, 128.48, 126.48, 125.76, 125.58, 124.03, 122.85, 117.90, 113.03, 80.43, 52.98; Anal. Calcd for  $\text{C}_{36}\text{H}_{20}\text{Cl}_2\text{N}_7\text{O}_7$ : C, 60.09; H, 2.80; N, 11.68. Found: C, 59.74; H, 2.96; N, 10.94.

## 2. In *vitro* fluorescence spectroscopy measurement

### General Procedure for $\text{H}_2\text{O}_2$ Detection

All UV–vis, fluorescence, and quantum yield measurements were carried out in 10 mM PBS buffer solution containing 5%  $\text{CH}_3\text{OH}$ , pH 7.4. In a 5 mL tube, PBS buffer (4 mL) and 250  $\mu\text{L}$  **ACF** (100  $\mu\text{M}$  in  $\text{CH}_3\text{OH}$ ) were mixed, and then 4 mM  $\text{H}_2\text{O}_2$  solution (50  $\mu\text{L}$ , 80 eq) was added. The final solution volume was adjusted to 5 mL with PBS buffer to obtain a final concentration of 5  $\mu\text{M}$ . After rapid mixing of the solution, it was transferred to a 10  $\times$  10 mm quartz cell and incubated at 37  $^\circ\text{C}$  for in vitro detection. Fluorescence spectra were recorded in the range from 480 to 700 nm with  $\lambda_{\text{ex}}$  = 450 nm, and absolute emission quantum yields were determined accordingly.

### Quantum Yields

Fluorescence quantum yields of **ACF** was determined in PBS buffer (10 mM, pH 7.4) with fluorescein ( $\Phi$  = 0.65, in water) as a reference. 2',7'-dichlorodihydrofluorescein was obtained in the experiment by addition of 80 eq of  $\text{H}_2\text{O}_2$  to the solution of probe **ACF**. The quantum yields were calculated using an Eq follows:

$$\Phi_u = [(A_s F A_u \eta^2) / (A_u F A_s \eta_0^2)] \Phi_s.$$

Where  $A_s$  and  $A_u$  are the absorbance of the reference and sample solution at the reference excitation wavelength,  $FA_s$  and  $FA_u$  are the corresponding integrated fluorescence intensity, and  $\eta$  and  $\eta_0$  are the solvent refractive indexes of sample and reference, respectively. Absorbance of sample and reference at their respective excitation wavelengths was controlled to be lower than 0.05.

Quantum yield of **ACF**:  $\Phi = 0.0024$

Quantum yield of **ACF**+ $H_2O_2$ :  $\Phi = 0.6780$

### Detection limit

To determine the detection limit, the emission intensity of probe **ACF** without  $H_2O_2$  was measured by 10 times and the standard deviation of blank measurements was determined. The detection limit was then calculated with the equation: detection limit =  $3\sigma/k$ , where  $\sigma$  was the standard deviation of blank measurements,  $k$  was the slope between intensity difference versus sample concentration. According to fluorometric method, the detection limit of probe **ACF** for  $H_2O_2$  was determined as 6.5 nM.

Detection limit of **ACF** =  $3\sigma/\text{slope} = 3 \times 0.008791473 / 4.05921 = 0.0065 \mu\text{M}$

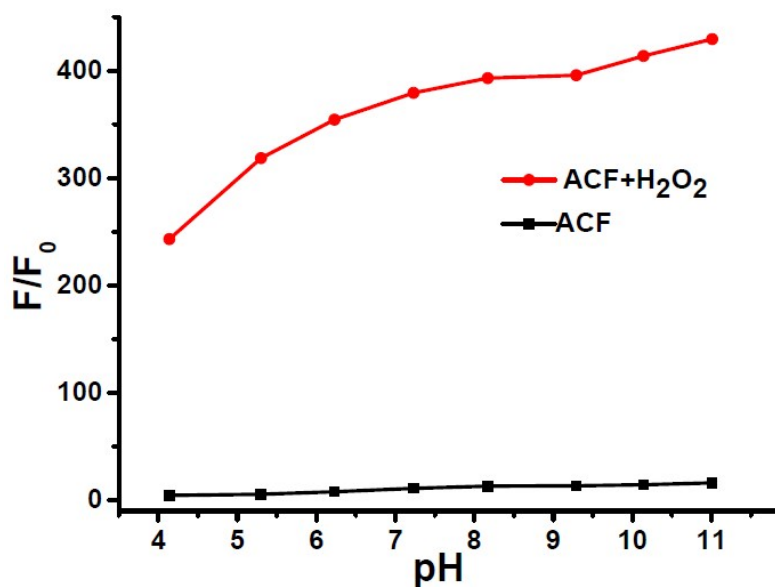

Fig.S1 Fluorescence response of **ACF** (5  $\mu\text{M}$ ) and **ACF** (5  $\mu\text{M}$ ) incubated with 80 eq of  $H_2O_2$  in  $CH_3OH$ /PBS buffer (10 mM, 5:95, pH from 4 to 11) for 90 min.  $\lambda_{\text{ex}} = 450 \text{ nm}$ ,  $\lambda_{\text{em}} = 527 \text{ nm}$ . Slits: 5/5 nm.

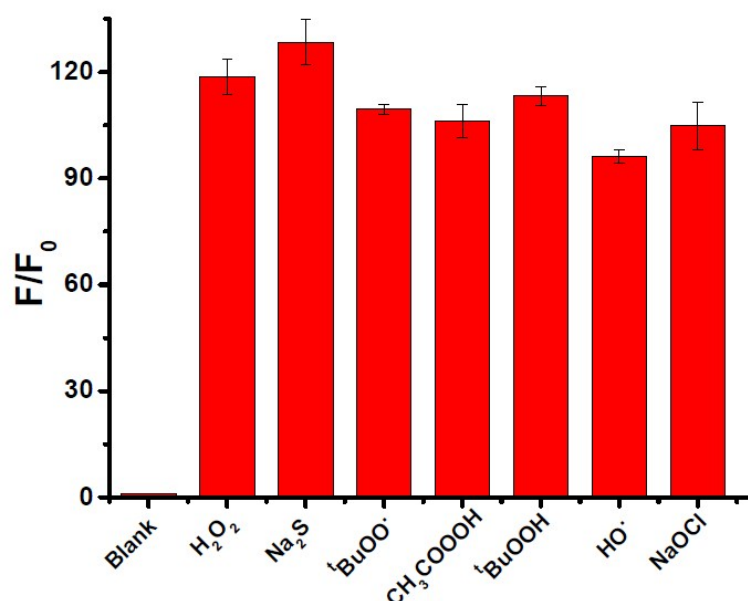

Fig.S2 Fluorescence responses of **ACF** (5  $\mu$ M) to H<sub>2</sub>O<sub>2</sub> and other ROS and H<sub>2</sub>S (80 eq) in CH<sub>3</sub>OH/PBS buffer (10 mM, pH = 7.4, 5/95) for 5 min. 1. Blank; 2. H<sub>2</sub>O<sub>2</sub>; 3. Na<sub>2</sub>S; 4. tBuOO·; 5. CH<sub>3</sub>CO<sub>3</sub>H; 6. tBuOOH; 7. HO·; 8. NaOCl.  $\lambda_{ex}$  = 450 nm,  $\lambda_{em}$  = 527 nm. Slits: 5/5 nm.

|               |                    |             |        |                 |              |                        |                      |
|---------------|--------------------|-------------|--------|-----------------|--------------|------------------------|----------------------|
| Sample Name   | 2015-0917-YANG-7   | Position    | P1-F7  | Instrument Name | Instrument 1 | User Name              |                      |
| Inj Vol       | -1                 | InjPosition |        | SampleType      | Sample       | IRM Calibration Status | Success              |
| Data Filename | 2015-0917-YANG-7.d | ACQ Method  | 0103.m | Comment         |              | Acquired Time          | 9/17/2015 3:41:50 PM |

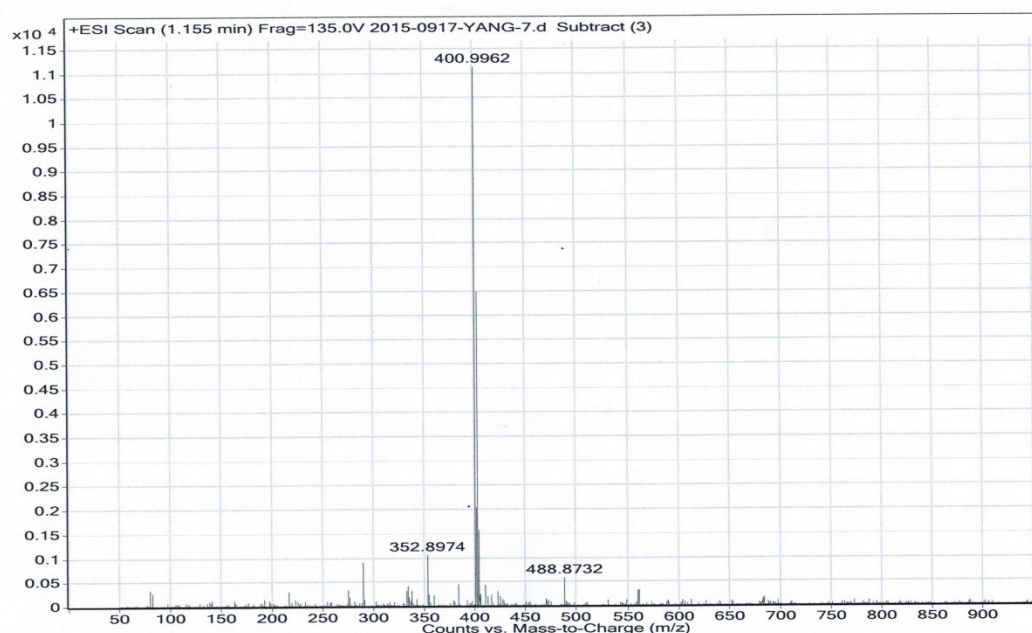

Fig.S3 HRMS chart of **ACF** treated with H<sub>2</sub>O<sub>2</sub> (80 eq).

### 3. MTT assay

The MTT assay was used to evaluate the cytotoxicity of probe. A-549 cells and Raw 264.7 cells were cultured in DMEM medium supplemented with 10% fetal

bovine serum at 37 °C in an atmosphere containing 5% CO<sub>2</sub>. A-549 cells and Raw 264.7 cells were seeded onto 96-well plates at a density of 1×10<sup>4</sup> cells/well and incubated for 24 h. The medium was replaced by various probe over a range of concentrations (0.5 μM to 30 μM) dissolved in culture medium. After incubation at 37 °C, 5% CO<sub>2</sub> for 24 h, each well of cells were treated with 20 μl MTT solution (5 mg/mL), and incubated for another 4 h. After that, the medium was removed, and 100 μL of DMSO were added to dissolve the formazan crystals. The plate was agitated for 10 min, and each well was finally analyzed by the microplate reader (Thermo Scientific, Multiskan FC) and detected by the absorbance at 570 nm.

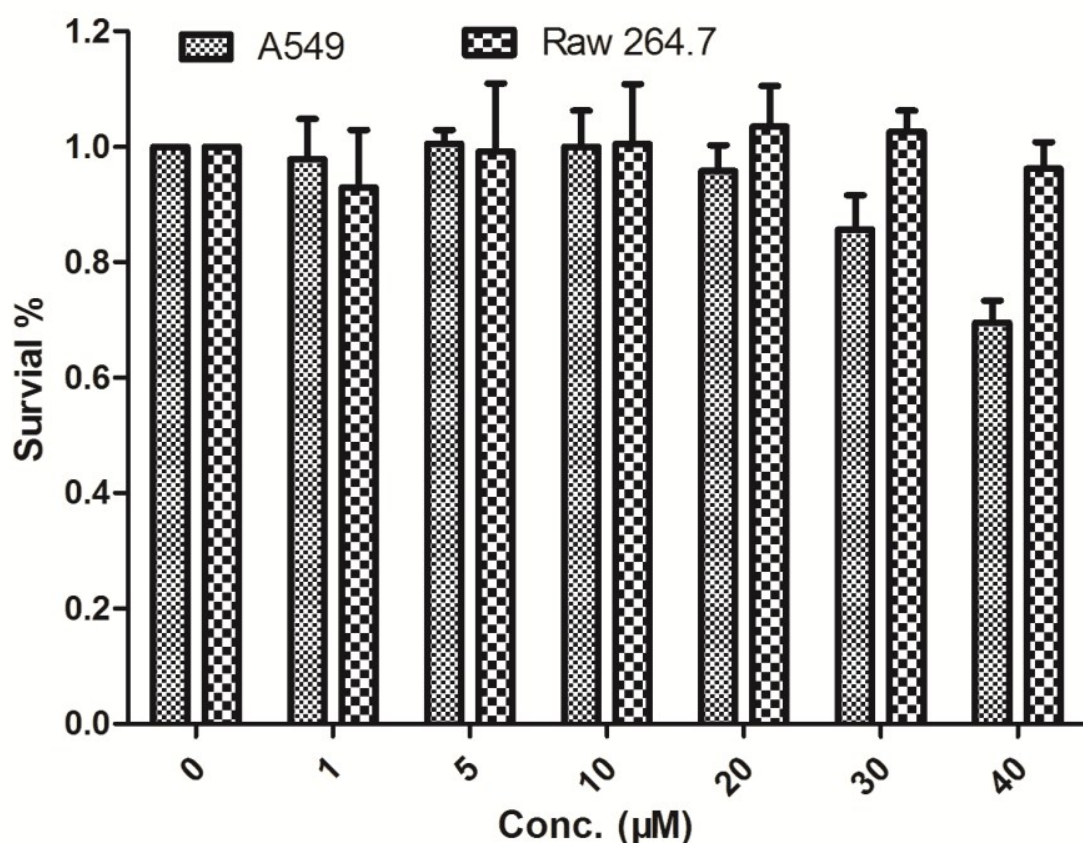

Fig.S4 The cytotoxicity of the probe **ACF** evaluated by the MTT assay

#### 4. Cell culture and fluorescence imaging

The HeLa cells were cultured in DMEM medium supplemented with 10% fetal bovine serum at 37 °C in an atmosphere containing 5% CO<sub>2</sub>. For live cells imaging, probe **ACF** was added to the cells and incubated for 10 min and washed with PBS (phosphate-buffered saline) three times. After replacement of the medium, cells

were imaged using an Olympus (FV1000) confocal laser scanning microscope with a CCD camera.

## 5. References

1. M. G. Choi, J. O. Moon, J. Bae, J. W. Lee and S.-K. Chang, *Org. Biomol. Chem.*, 2013, **11**, 2961.
2. Z. Wu, Z. Li, L. Yang, J. Han and S. Han, *Chem. Commun.*, 2012, **48**, 10120.

## 7. $^1\text{H}$ NMR, $^{13}\text{C}$ NMR chart of compounds ACF

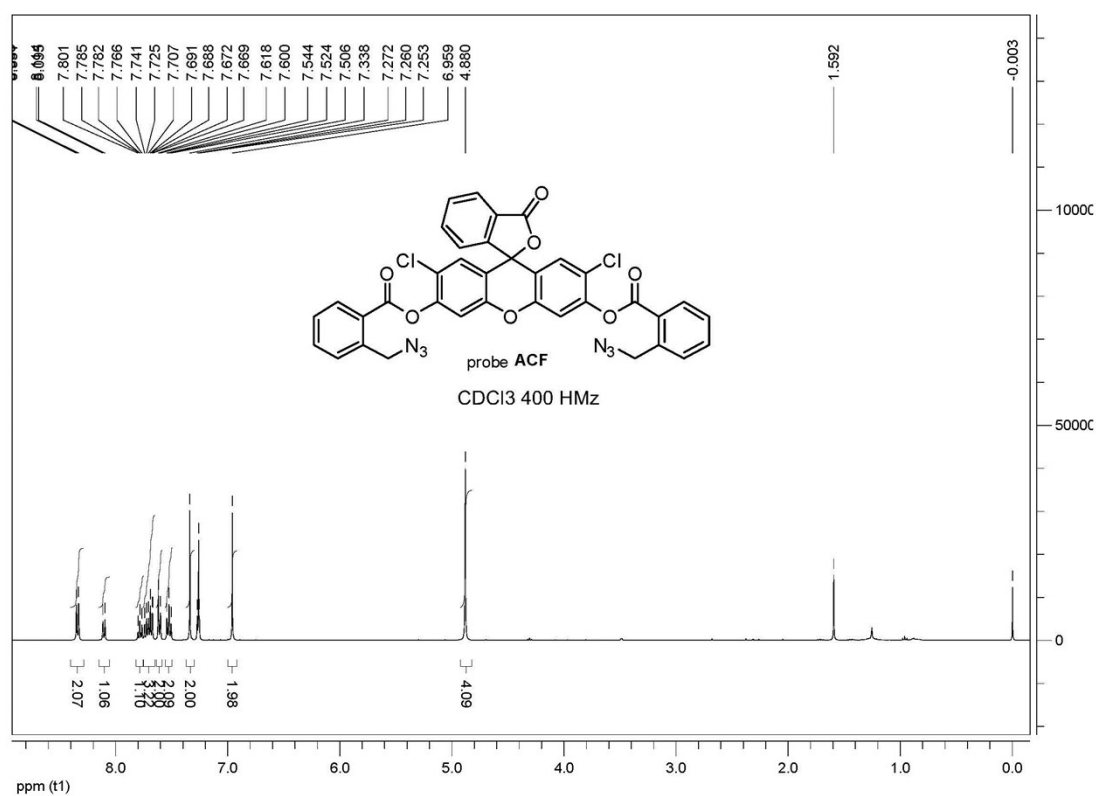

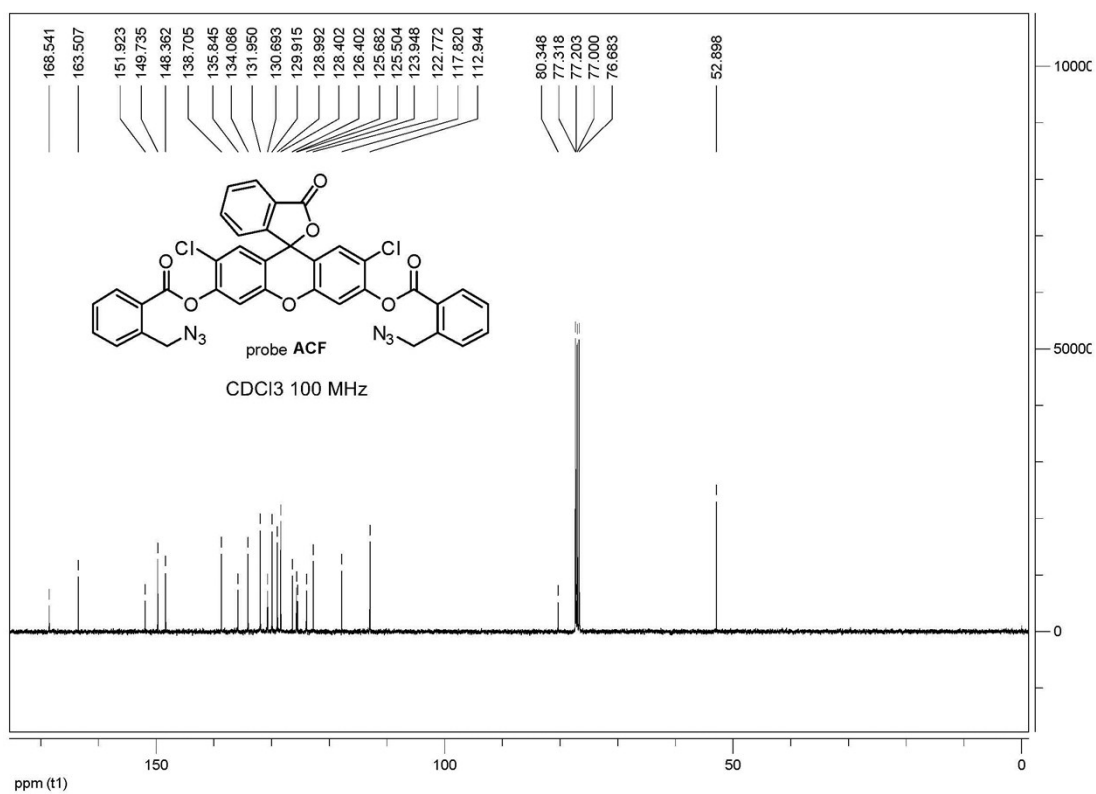

Supplement: c6ra12984f1.pdf [file c6ra12984f1.pdf]
